# Supplementary material for: Commercially Available Phototherapy Devices for Treatment of Depression: Physical Characteristics of Emitted Light
Source: Atypon-hosted journal article supplement (doi:10.1176/appi.prcp.2019.20180011), 2019-10-01
Supplement: appi.prcp.2019.20180011.ds001.pdf [file appi.prcp.2019.20180011.ds001.pdf]

**Supplementary Figure SF1.**

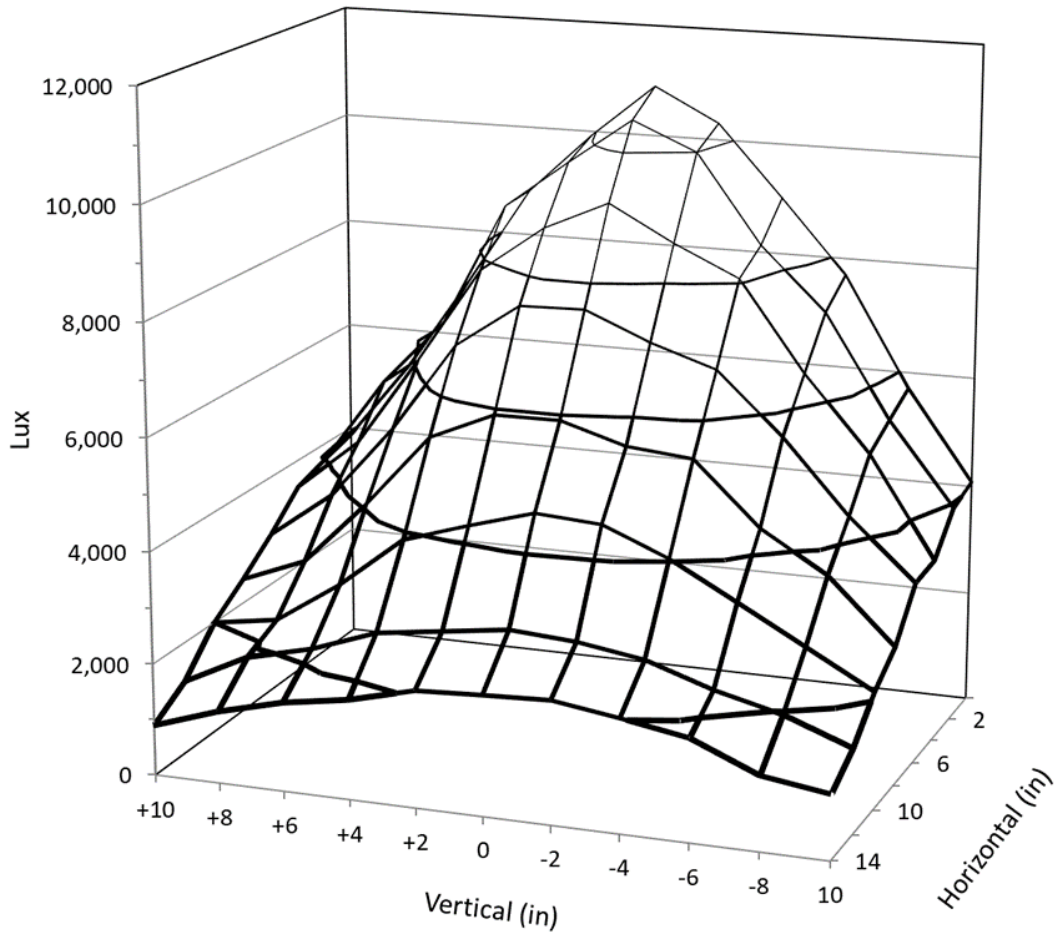

**Supplemental Figure SF1.** Illuminance (lux) versus position in the plane of the observer at MRD for device X4. Intensity declines with vertical displacement above or below the device axis or lateral displacement sideways from the device axis.

**Supplemental Table ST1. Research-supported devices for SAD treatment.** Model and manufacturer are shown for selected devices in this study.

**FULL-SIZE 10,000 LUX LIGHT BOXES.** These devices are similar to those used in most research studies on bright light therapy for Seasonal Affective Disorder (SAD). Device X2 does not appear to be marketed at this time.

Device X1. SunRay II

The SunBox Company, 201 Broadway Street, Suite 220, Frederick, MD 21701  
800-548-3968, 240-651-3286  
orders@sunbox.com  
www.sunbox.com

Device X3. NorthStar 10,000

Alaska Northern Lights, Inc., 59 Damonte Ranch Pkwy, #B-262, Reno, NV 89521  
800-880-6953, 775-852-8192  
info@alaskanorthernlights.com  
www.alaskanorthernlights.com

Device X4. Day-Light Classic (DL930)

Carex Health Brands, 921 E Amidon St., Sioux Falls, SD 57104  
800-526-8051  
info@carex.com  
day-lights.com

**SMALLER 10,000 LUX LIGHT BOXES.** In our tests several smaller light boxes appeared to meet our specifications for 10,000 lux therapy. The user will need to sit closer and may not be able to move as much side-to-side. Some users may feel that the decrease in convenience would be offset by the more compact size of the device.

Device X5. BOXelite

Northern Light Technologies, Inc., 8971 Henri-Bourassa Blvd. West, Montreal, Qc H4S 1P7 Canada  
800-263-0066, 514-335-1763  
info@NorthernLightTechnologies.com  
northernlighttechnologies.com

Device X6. Day-Light Sky (DL2000)

Carex Health Brands, 921 E Amidon St., Sioux Falls, SD 57104  
800-526-8051  
info@carex.com  
day-lights.com

Device X11. SunTouch Plus

Nature Bright Company, 5251 California Ave Suite 130 Irvine, CA 92617  
800-622-0231, 949-625-4900,  
www.naturebright.com

**LIGHT-EMITTING DIODE (LED) BEAM DEVICES.** A smaller amount of research supports the use of small LED devices for SAD. Such devices are much more compact than conventional light boxes, may be battery powered, but must be carefully aligned to keep the eyes in the beam. The intensity of 10,000 lux does not seem to be required.

Device M1. Litebook Advantage

The Litebook Company LTD, #6, 941 South Railway St SE, Medicine Hat, Alberta T1A 2W3 Canada  
877-723-5483, 403-504-1533  
info@litebook.com  
litebook.com

**LIGHT VISORS.** Four controlled clinical trials in the 1990s found no evidence that incandescent light visors are effective for SAD. Only one small uncontrolled trial of newer visors using LED sources has been published in abstract form, suggesting therapeutic effect in SAD. Device V1 is one of the two green light devices in the study.

Device V1. Feel Bright Light

Physician Engineered Products, 103 Smith Street, Fryeburg, ME 04037  
800-622-6240, 207-935-1256  
info@feelbrightlight.com  
www.feelbrightlight.com

Device V3. SolarMax Light Visor

BioBrite, Inc, 4350 East-West Highway, Suite 520, Bethesda, MD 20814  
301-961-5940  
info@biobrite.com  
www.biobrite.com/

**LIGHT COLUMNS.** An array of two columns was found to shift circadian rhythms similar to a 10,000 lux light box, and a similar double array has been used in other depression research. We are unaware of any controlled trial of the therapeutic effect of this device in SAD. Device C1 is one of the two green light devices in the study: one would need to purchase two columns or a double column device to duplicate the arrays used in circadian and depression research.

Device C1. Lo-LIGHT Therapy Lamp

Sunnex Biotechnologies, Suite 657, 167 Lombard Ave. Winnipeg, MB R3B0V3 Canada  
877-778-6639, 204-956-2476  
www.sunnexbiotech.com

*Product names listed above may be registered trademarks.*
